# Supplementary material
Source: MDPI journal article supplement (https://www.mdpi.com/2673-8007/3/3/57)
Supplement: s1 [file s1]

### Additional explanation to the UPOs applied:

*Aae*UPO – main abundant UPO of *Agrocybe aegerita*  
*Cab*MQ II – acidic UPO of *Candolleomyces aberdarensis*  
*Cab*MSII – neutral UPO of *Candolleomyces aberdarensis*  
*Cca*MQ2 – acidic UPO of *Candolleomyces candolleana* (Vietnam)  
*Ceu*MQ5 – acidic UPO of *Candolleomyces eurysporus*  
*Ceu*MS3 – neutral UPO of *Candolleomyces eurysporus*  
*Cgl*UPO – main abundant UPO of *Chaetomium globosum*  
*Cra*UPO – main abundant UPO of *Coprinellus radians*  
*Mro*UPO – main abundant UPO of *Marasmius rotul*  
*Mwe*UPO – main abundant UPO of *Marasmius wettsteinii*  
*rCab*2UPO – recombinant acidic UPO of *Candolleomyces aberdarensis*  
*rCab*1UPO – recombinant acidic UPO of *Candolleomyces aberdarensis*

### Supplemental Figures and Tables referring to results part:

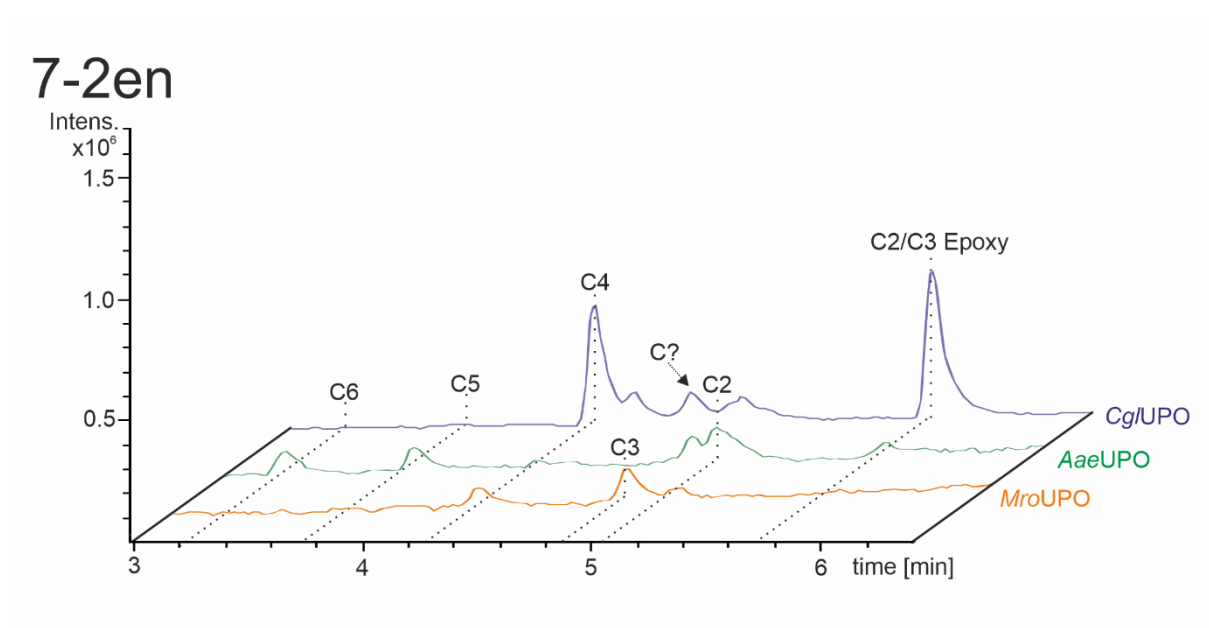

**Figure S1a.** MS-Chromatograms of reaction setups including 2-heptenoic acid and three different UPOs (*Cgl*UPO, *Aae*UPO and *Mro*UPO).

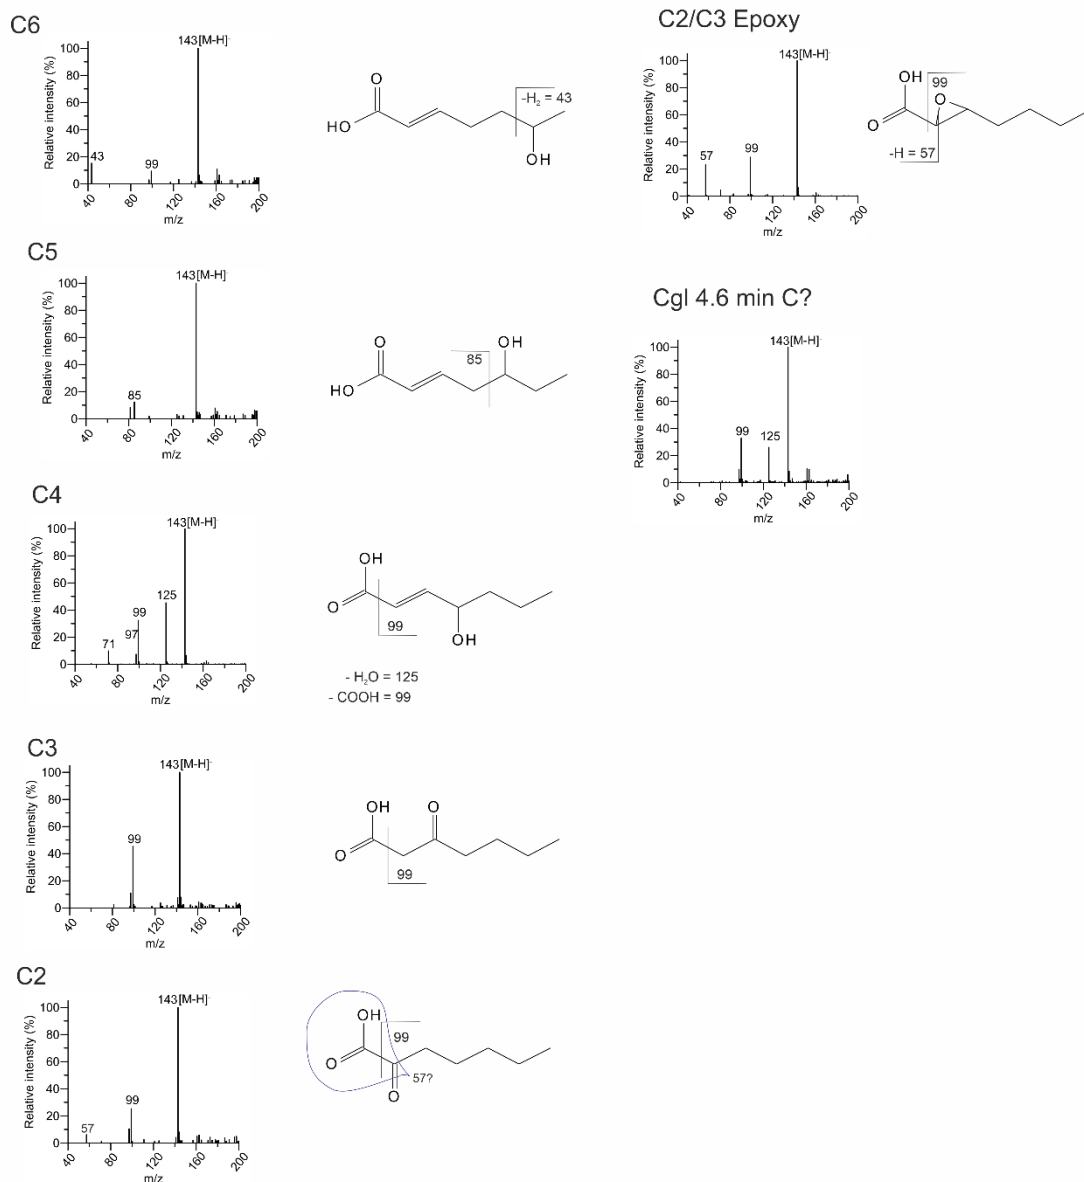

**Figure S1b.** MS-fragmentation patterns of products deriving from 2-heptenoic acid

# 7-3en

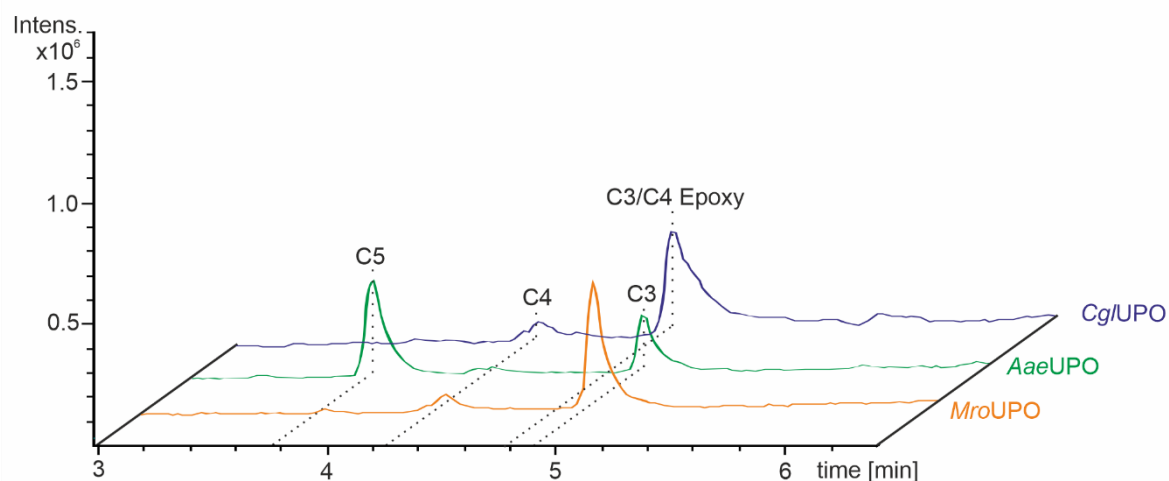

**Figure S2a.** MS-Chromatograms of reaction setups including 3-heptenoic acid and three different UPOs (Cg/UPO, Aae/UPO and Mro/UPO).

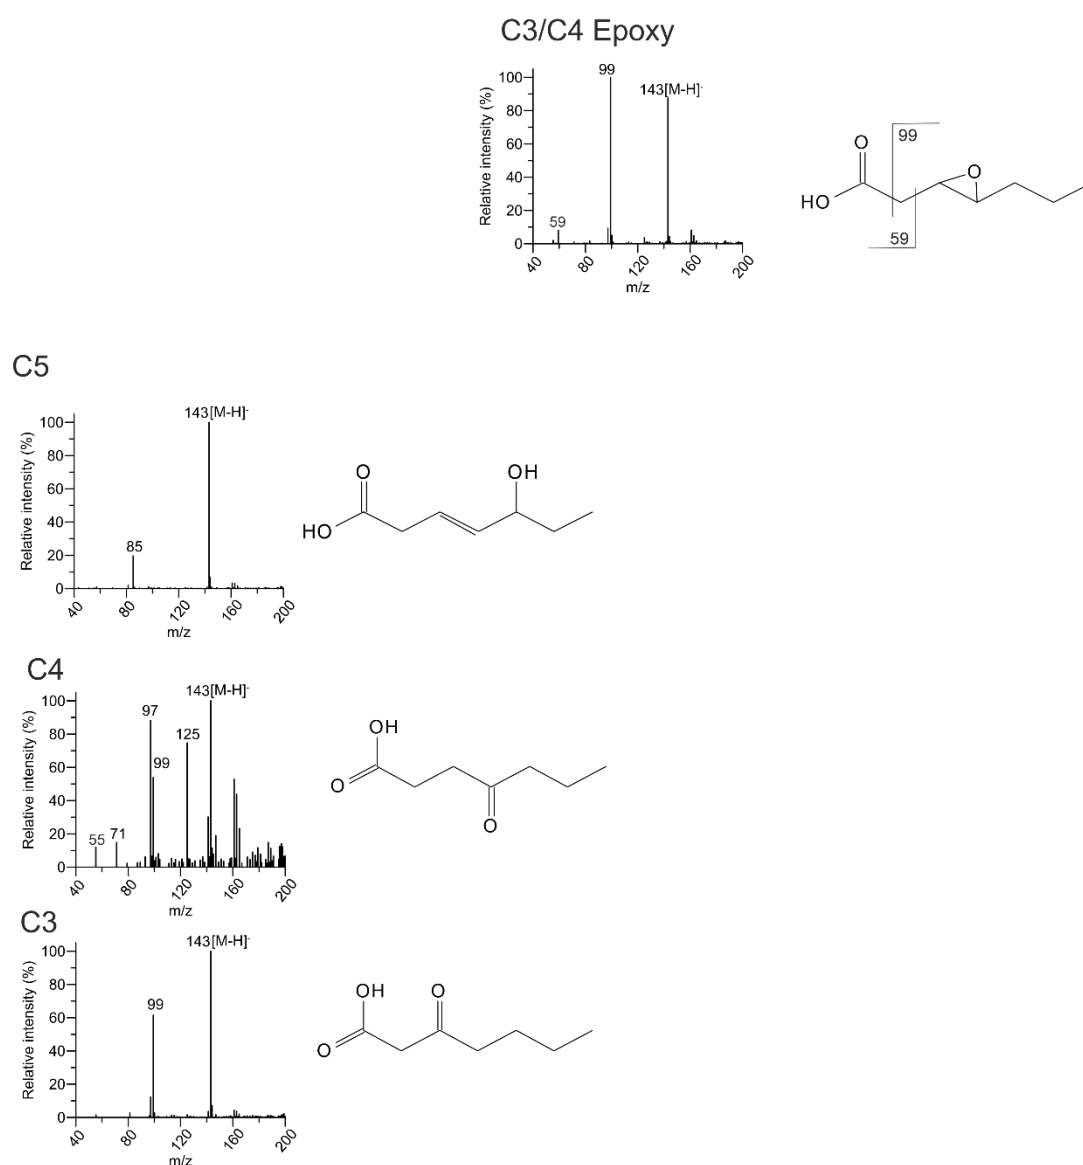

**Figure S2b:** MS-fragmentation patterns of products deriving from 3-heptenoic acid

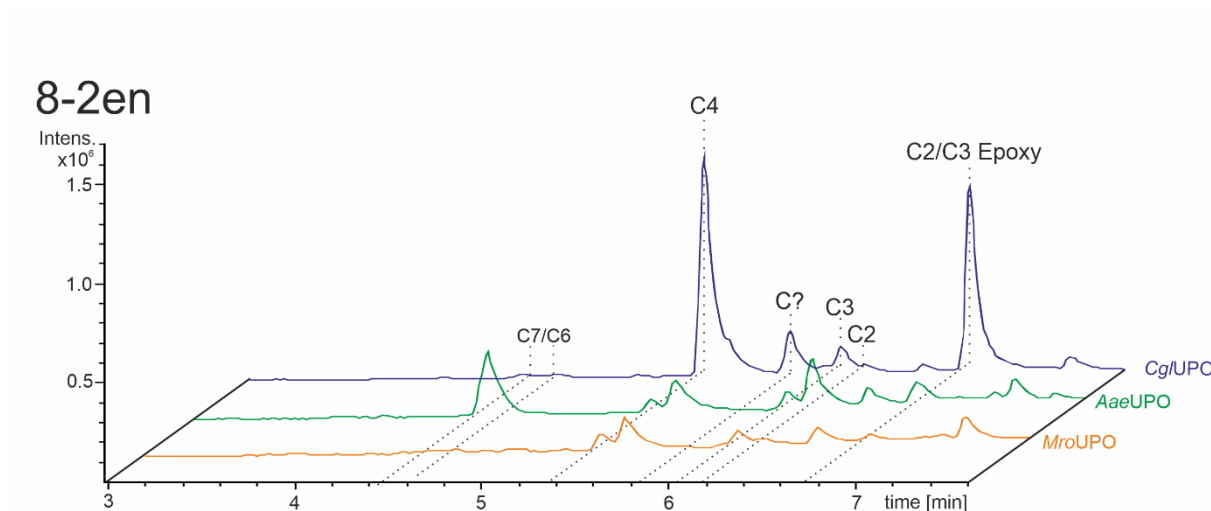

**Figure S3a.** MS-Chromatograms of reaction setups including 2-octenoic acid and three different UPOs (*Cg*/UPO, *Aae*UPO and *Mro*UPO).

C7

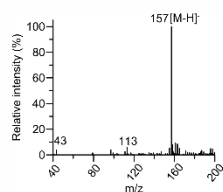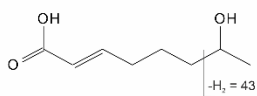

C2/C3 Epoxy

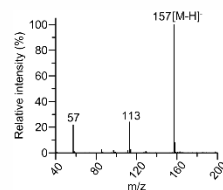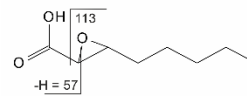

C6

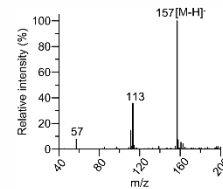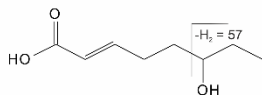

Cgl C?

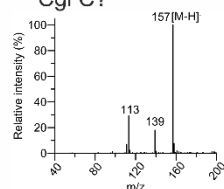

No C5

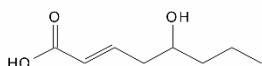

C4

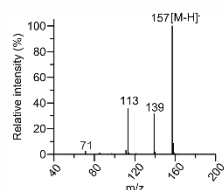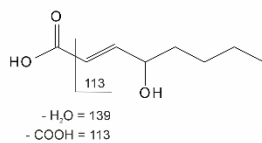

C3

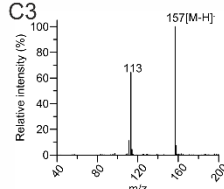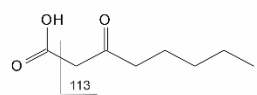

C2

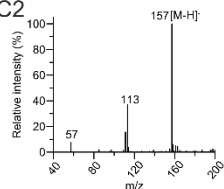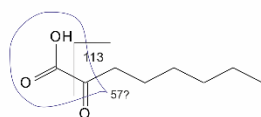

Figure S3b. MS-fragmentation patterns of products deriving from 2-octenoic acid

8-3en

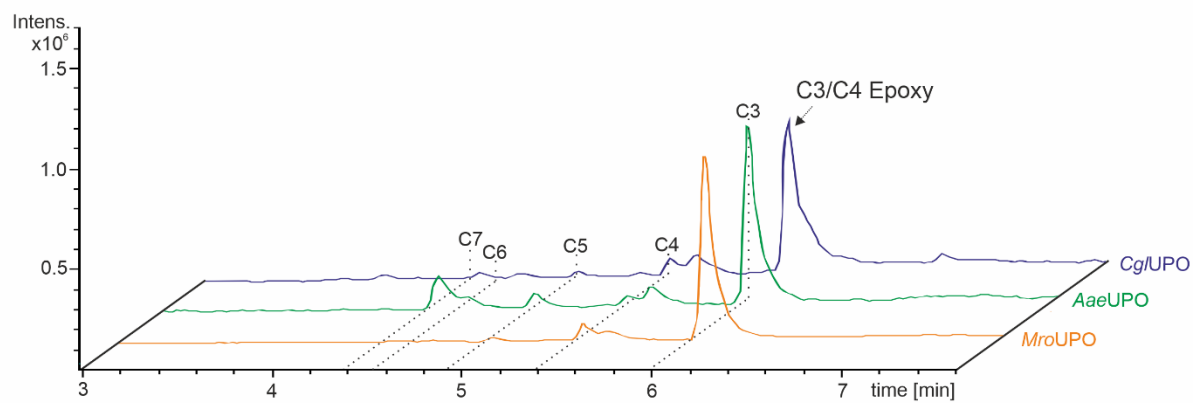

**Figure S4a.** MS-Chromatograms of reaction setups including 3-octenoic acid and three different UPOs (*Cgl*UPO, *Aae*UPO and *Mro*UPO).

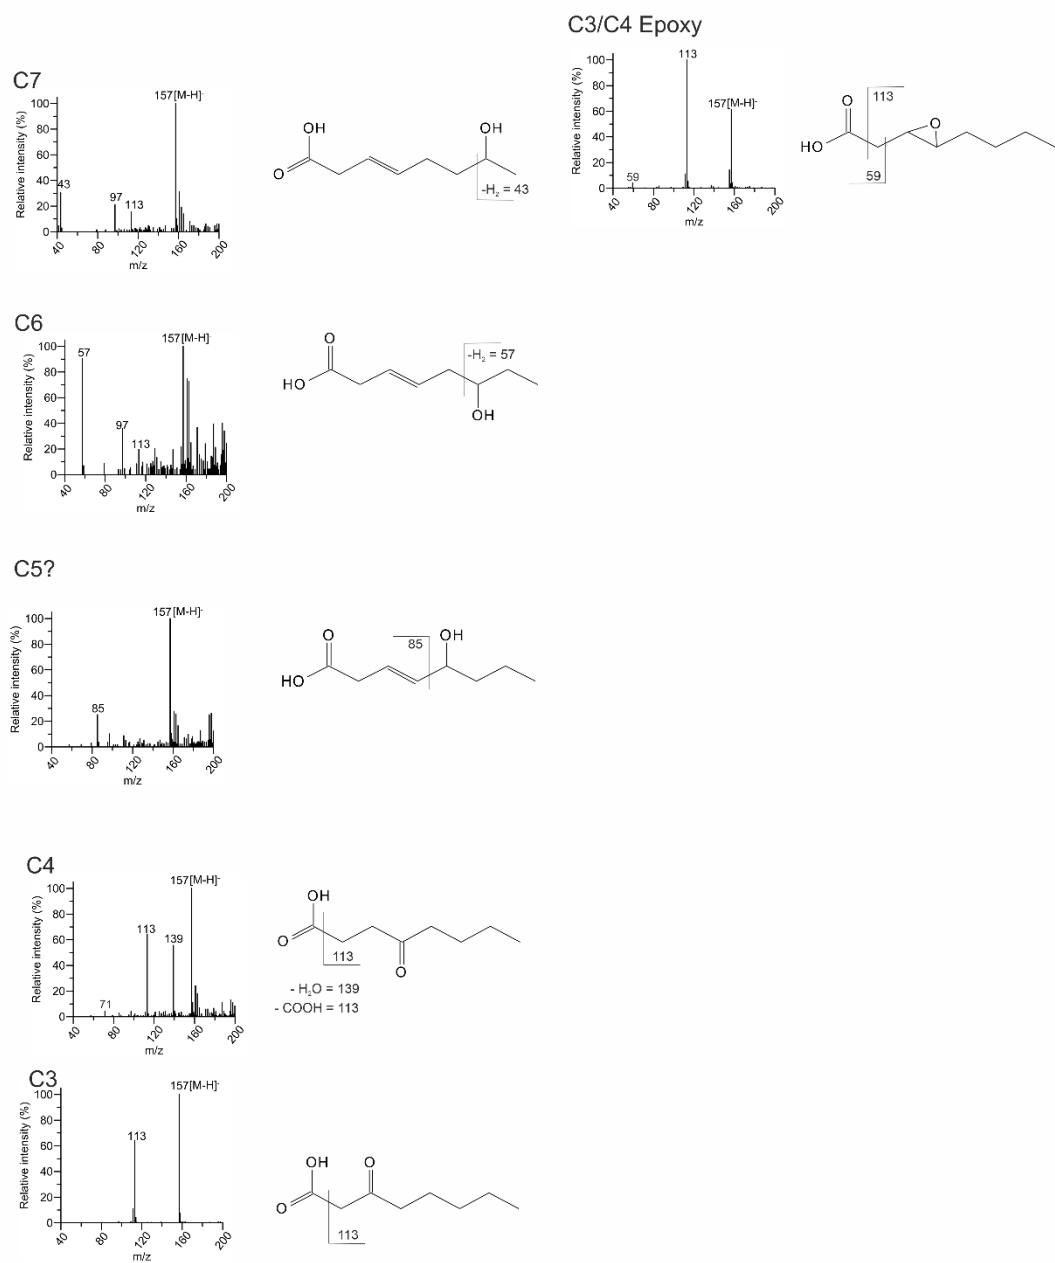

**Figure S4b.** MS-fragmentation patterns of products deriving from 3-octenoic acid.

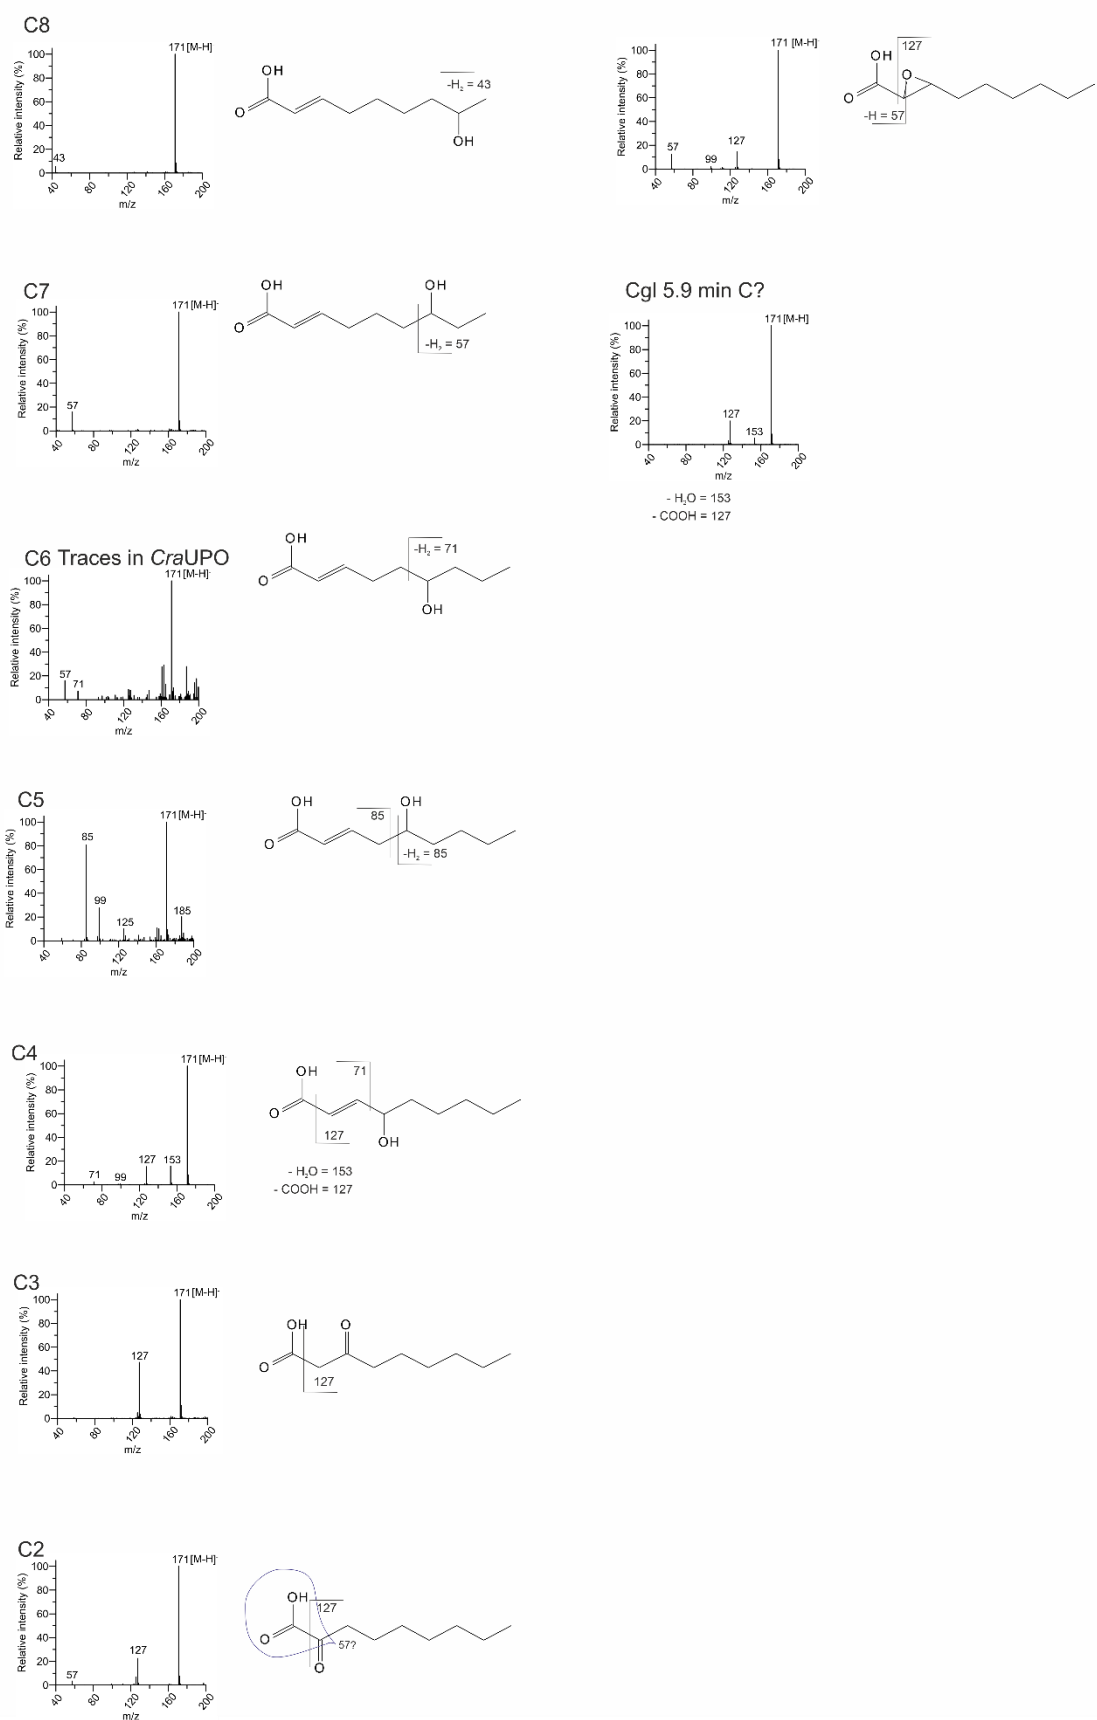

**Figure S5.** MS-fragmentation patterns of products deriving from 2-nonenic acid.

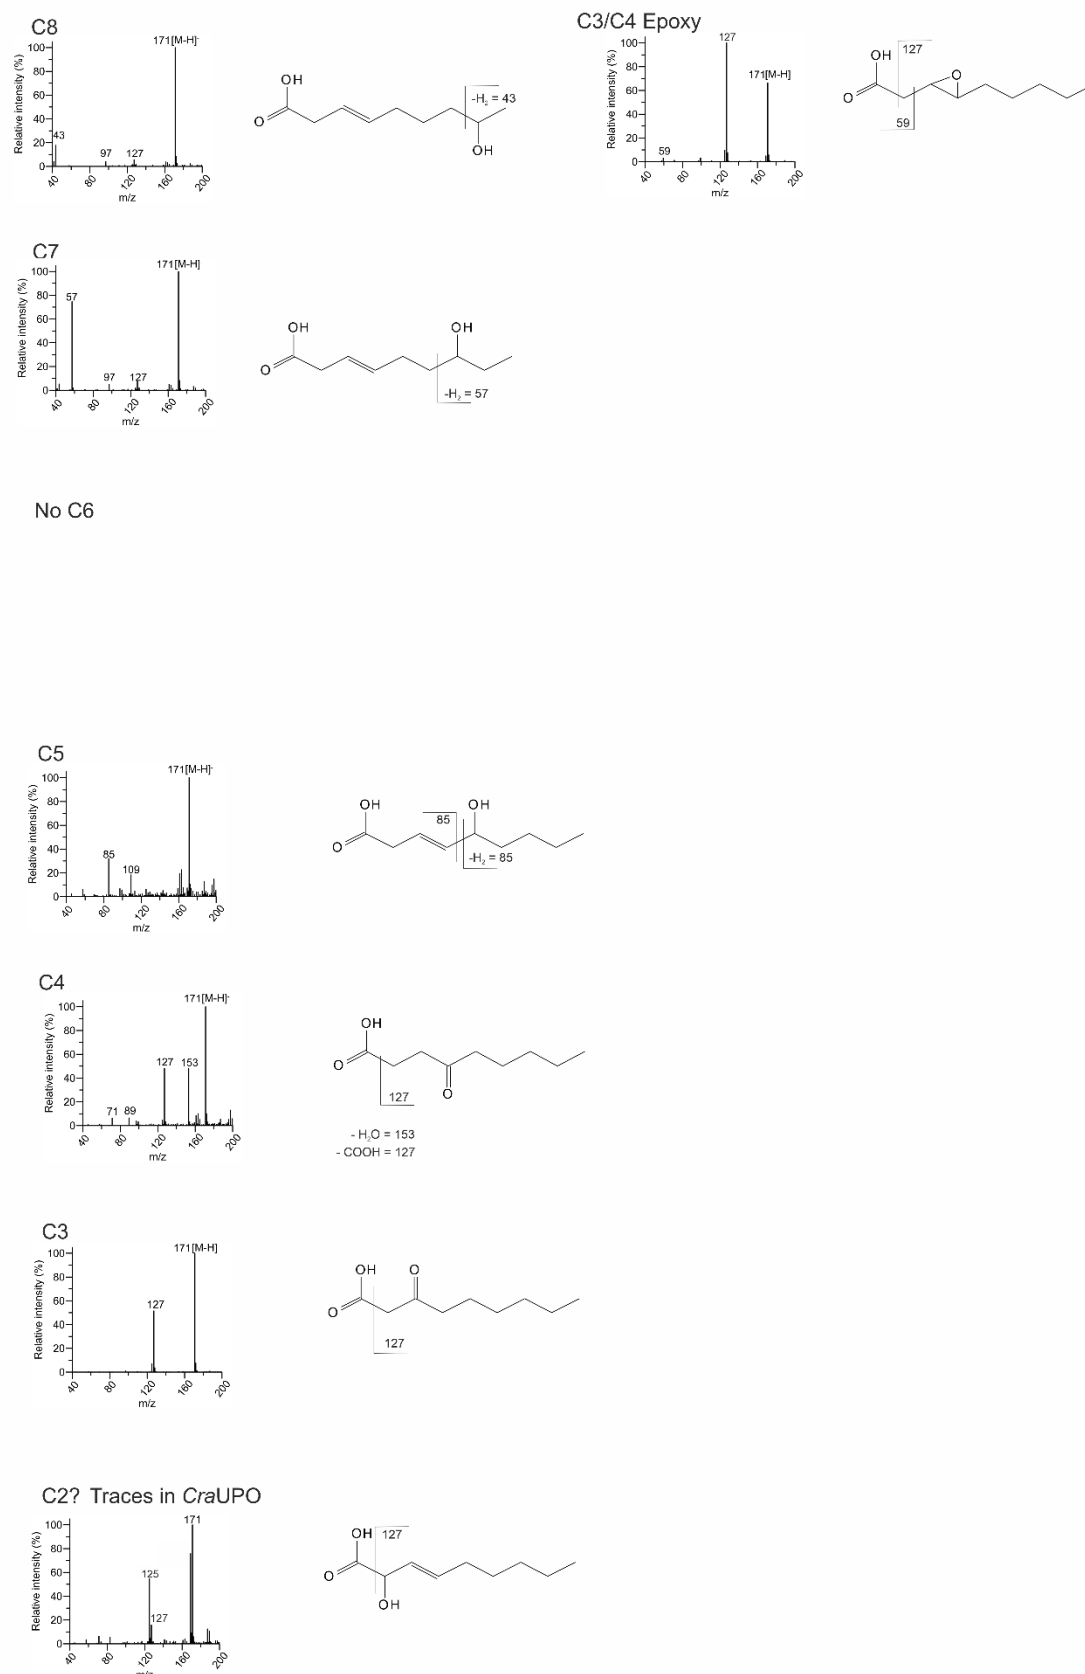

**Figure S6.** MS-fragmentation patterns of products deriving from 3-nonenic acid.

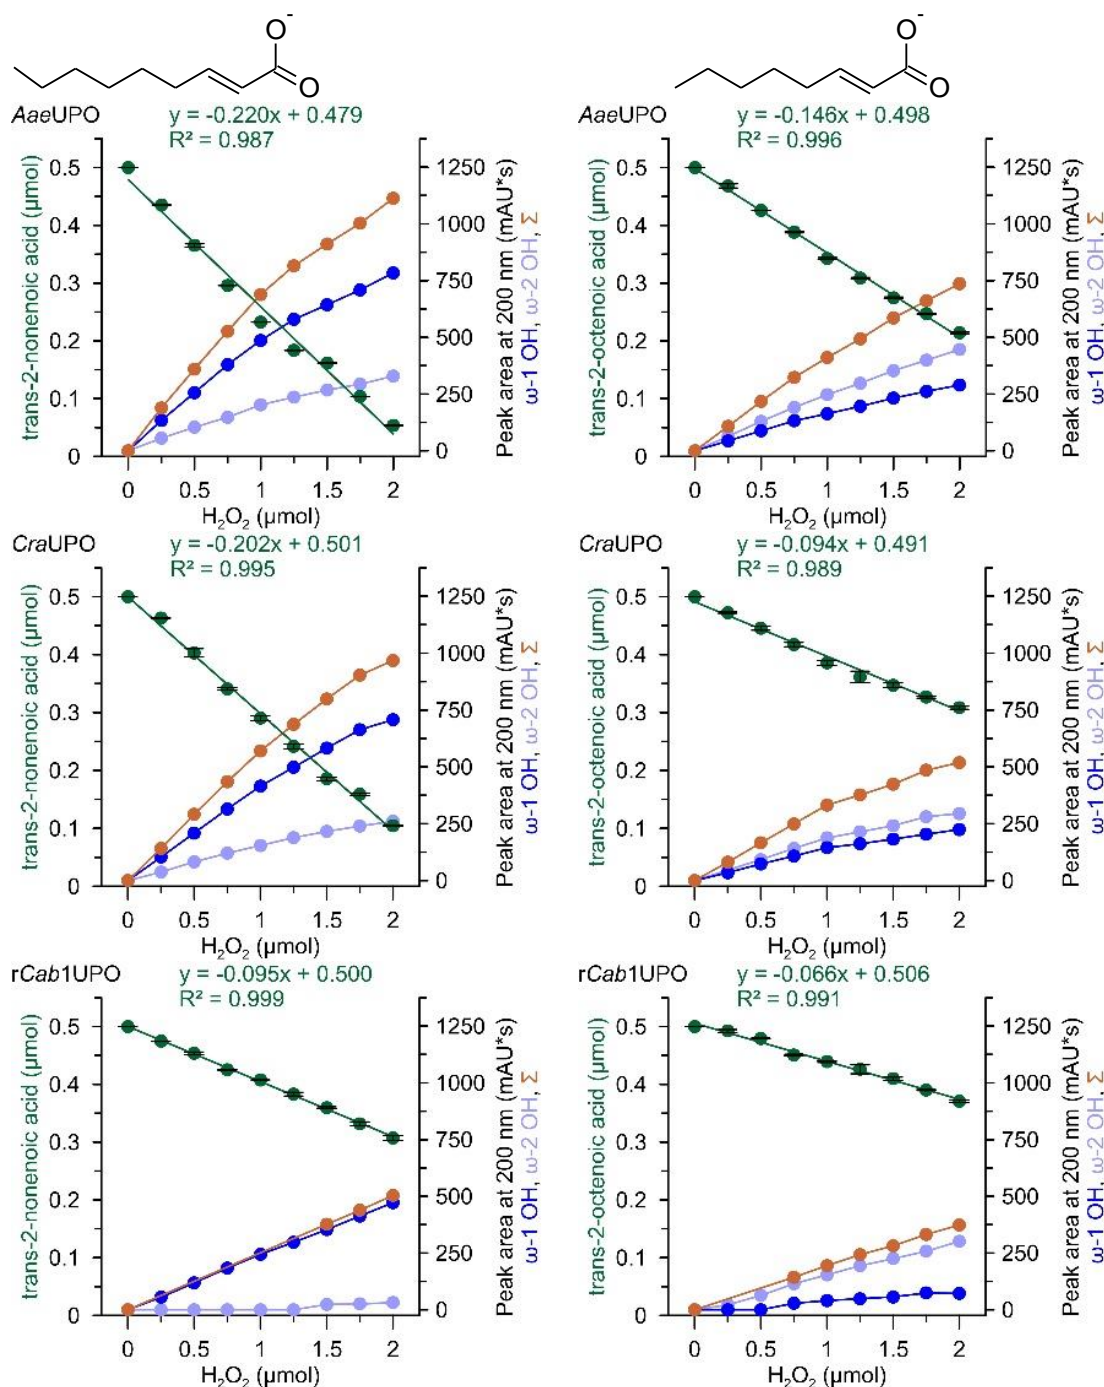

**Figure S7:** Amount of residual trans-2-nonenic acid (t-C9-2-en, left, green) or trans-2-octenoic acid (t-C8-2-en, right, green), as well as peak areas (relative for each product only) of the corresponding ω-1 (dark blue) and ω-2 (light blue) hydroxy products or further UV-absorbing products after different amount of  $H_2O_2$  dosage (orange represents the sum of both products). For MS-based product quantification refer to Tables 5 and 6.

Reaction setup: 0.5 μmol t-C9-2-en and t-C8-2-en, UPO 0.5 U (Valc), 10 mM  $KP_i$  pH 6 and 10% acetone. Formulas refer to the initial conversion rates of FA in μmol [C9-2-en]/μmol [ $H_2O_2$ ]

Conclusion: Continuous conversion of FA - TON was not reached under the conditions tested.

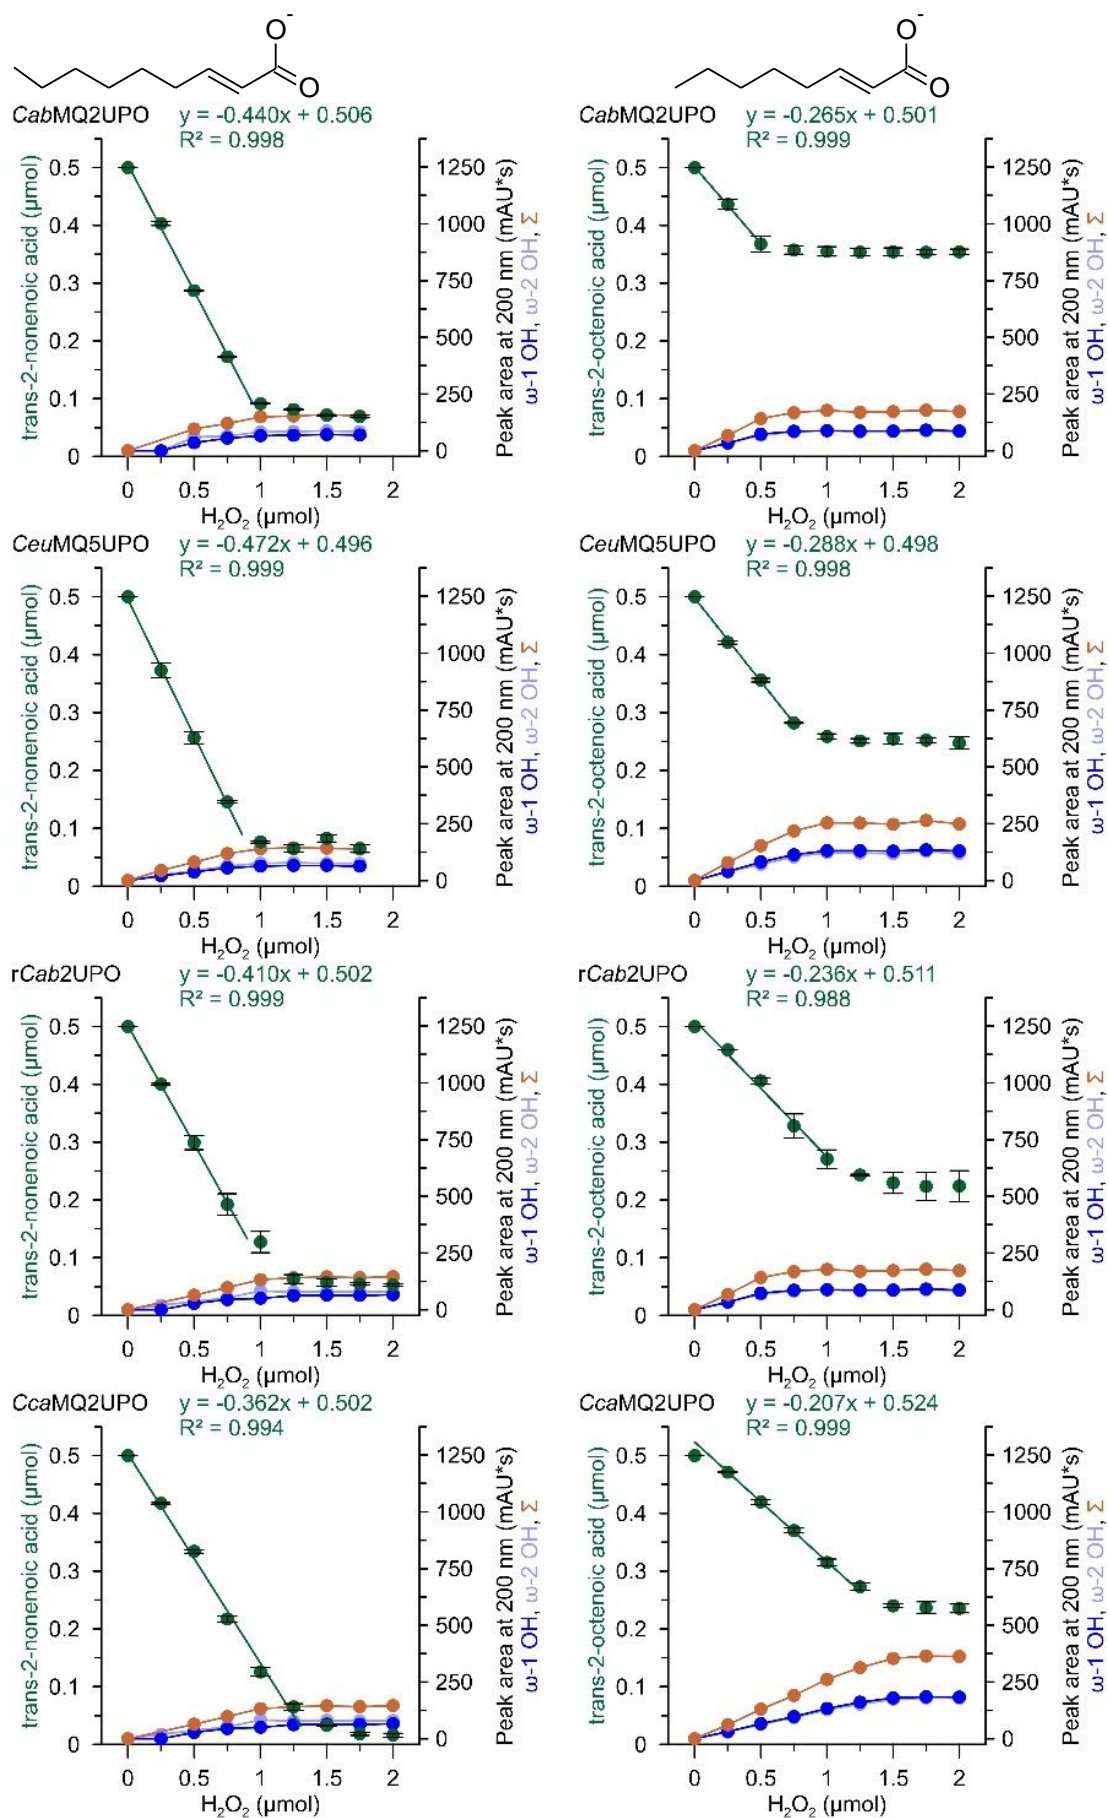

**Figure S8.** Amount of residual trans-2-nonenic acid (t-C9-2-en, left, green) or trans-2-octenoic acid (t-C8-2-en, right green), as well as peak areas (relative for each product only) of the corresponding  $\omega$ -1

(dark blue) and  $\omega$ -2(light lue) hydroxy products or further UV-absorbing products after different amount of  $\text{H}_2\text{O}_2$  dosage (orange represents the sum of both products). For MS-based product quantification refer to Tables 5 and 6.

Reaction setup: 0.5  $\mu\text{mol}$  t-C9-2-en and t-C8-2-en, UPO 0.5 U (Valc), 10 mM  $\text{KPi}$  pH 6 and 10% acetone.

Formulas refer to the initial conversion rates of FA in  $\mu\text{mol}$  [C9-2-en]/ $\mu\text{mol}$  [ $\text{H}_2\text{O}_2$ ]

Conclusion: Nearly “completed” conversion of FA C9-2en – but not in case of C8-2en.

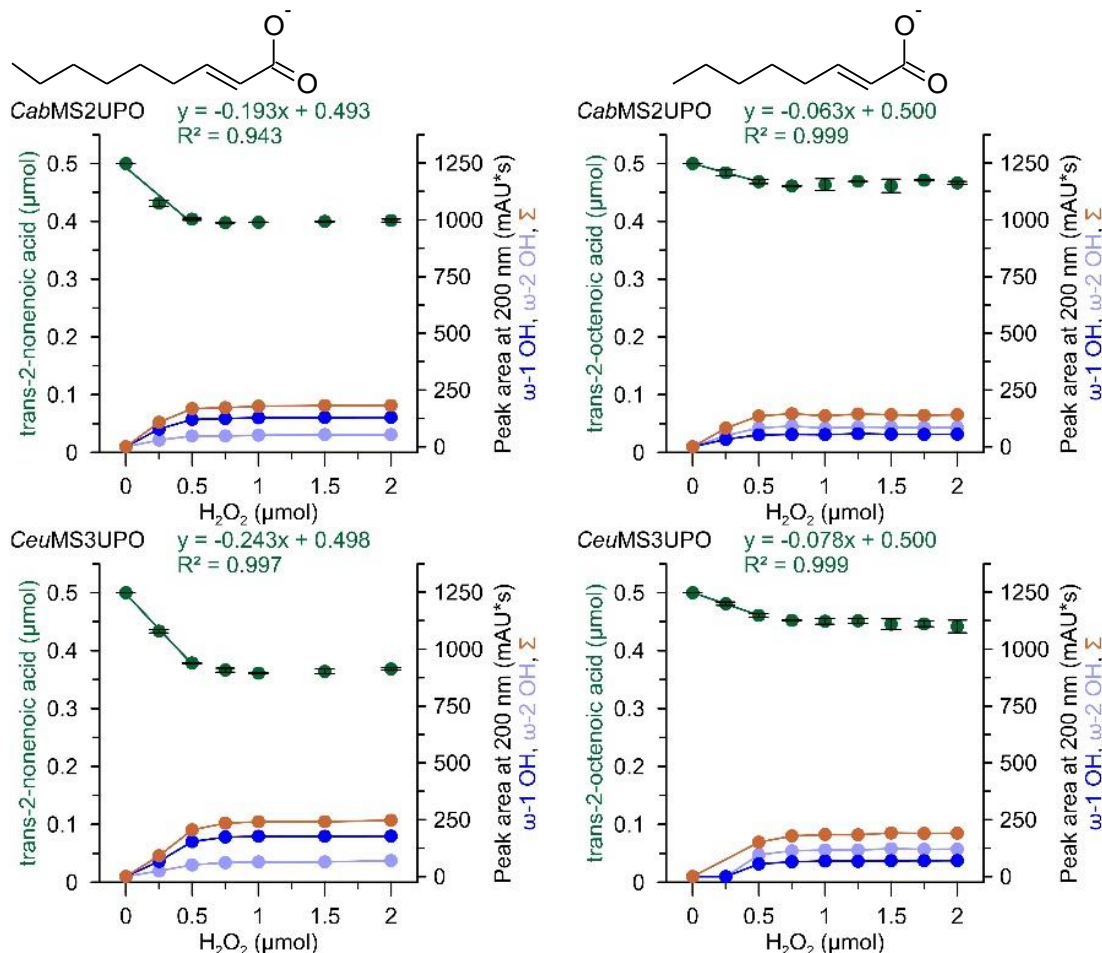

**Figure S9.** Amount of residual trans-2-nonenic acid (t-C9-2-en, left green) or trans-2-octenoic acid (t-C8-2-en, right, green), as well as peak areas (relative for each product only) of the corresponding  $\omega$ -1 (dark blue) and  $\omega$ -2 (light blue) hydroxy products or further UV-absorbing products after different amount of  $\text{H}_2\text{O}_2$  dosage (orange represents the sum of both products). For MS-based product quantification refer to Tables 5 and 6.

Reaction setup: 0.5  $\mu\text{mol}$  t-C9-2-en and t-C8-2-en, UPO 0.5 U (Valc), 10 mM  $\text{KPi}$  pH 6 and 10% acetone.

Formulas refer to the initial conversion rates of FA in  $\mu\text{mol}$  [C9-2-en]/ $\mu\text{mol}$  [ $\text{H}_2\text{O}_2$ ]

Conclusion: “incomplete” conversion of FA - TON was reached.

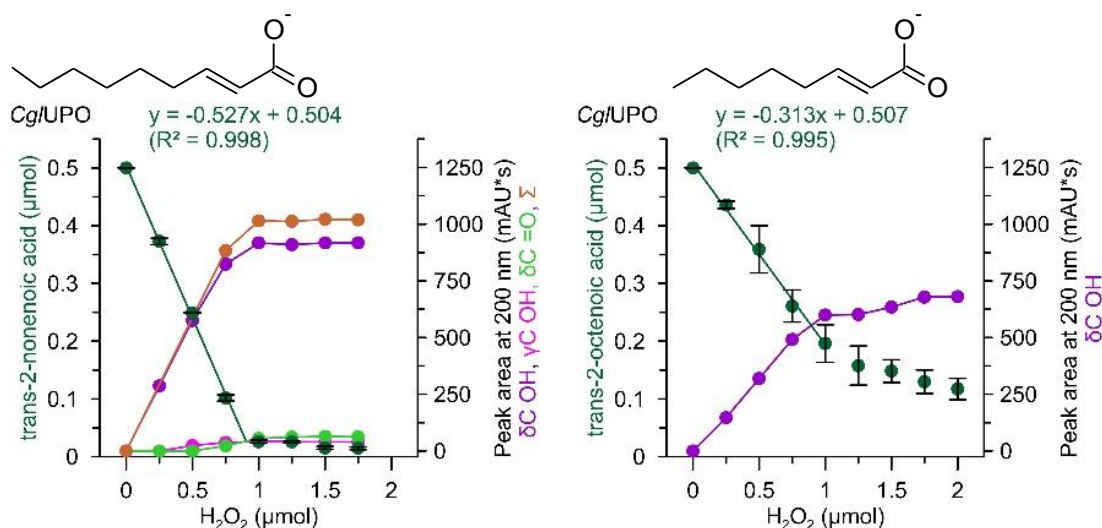

**Figure S10.** Amount of residual trans-2-nonenic acid (t-C9-2-en, left, green) or trans-2-octenoic acid (t-C8-2-en, right, green), as well as peak areas (relative for each product only) of the corresponding tentatively identified products after different amount of H<sub>2</sub>O<sub>2</sub> dosage ( $\delta$ -hydroxy violet,  $\gamma$ -hydroxy pink,  $\delta$ -keto green, sum of products, orange). For MS-based product quantification refer to Tables 5 and 6.

Reaction setup: 0.5  $\mu$ mol t-C9-2-en and t-C8-2-en, UPO 0.5 U (Valc), 10 mM KP<sub>i</sub> pH 6 and 10% acetone. Formulas refer to the initial conversion rates of FA in  $\mu$ mol [C9-2-en]/ $\mu$ mol [H<sub>2</sub>O<sub>2</sub>]

Conclusion: "complete" conversion of FA in case of C9-2en; but TON was reached for C8-en2

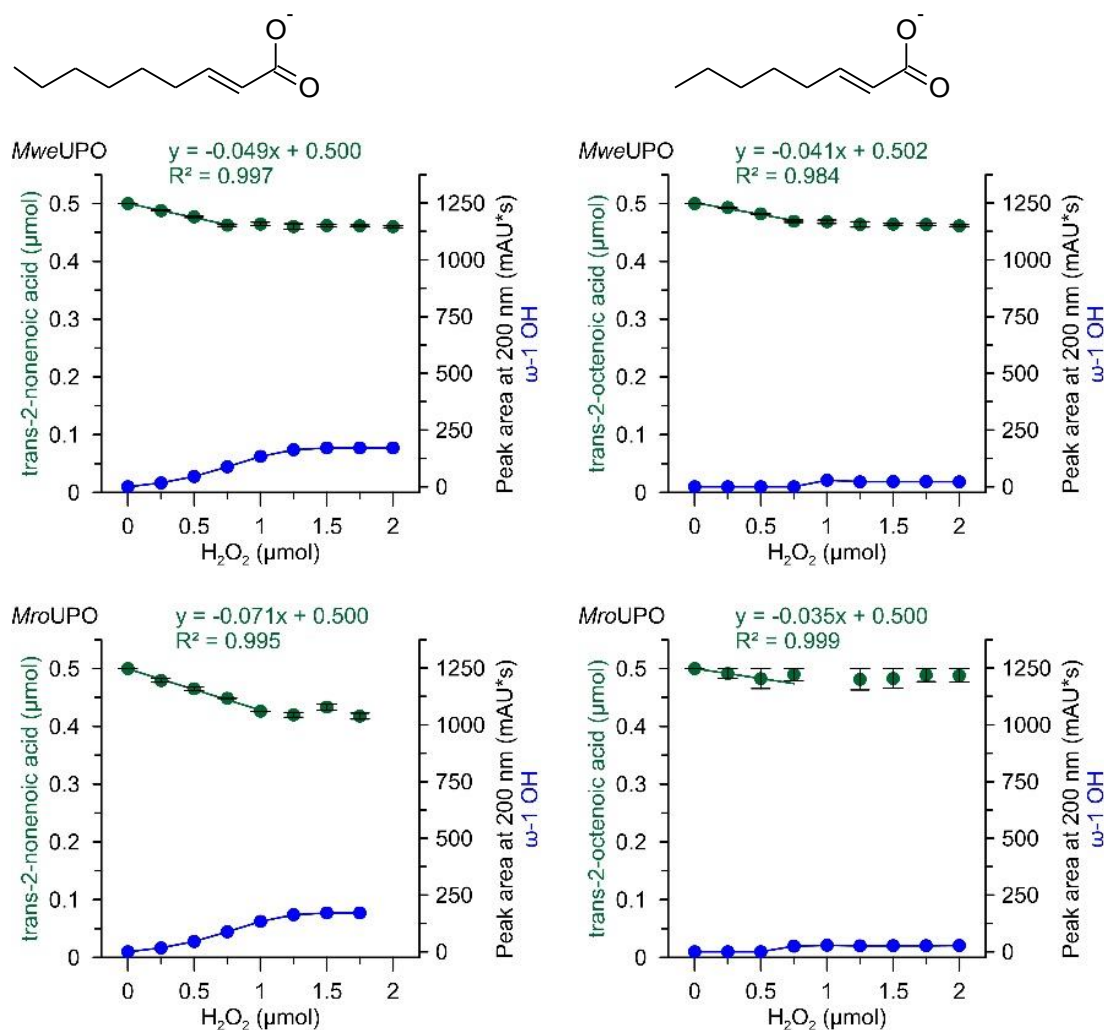

**Figure S11.** Amount of residual *trans*-2-nonenic acid (t-C9-2-en, left, green) or *trans*-2-octenoic acid (t-C8-2-en, right, green), as well as peak areas (relative for each product only) of the corresponding  $\omega$ -1 product (dark blue) after different amount of H<sub>2</sub>O<sub>2</sub> dosage. For MS-based product quantification refer to Tables 5 and 6.

Reaction setup: 0.5  $\mu$ mol t-C9-2-en and t-C8-2-en, UPO 0.5 U (Valc), 10 mM KPi pH 6 and 10% acetone. Formulas refer to the initial conversion rates of FA in  $\mu$ mol [C9-2-en]/ $\mu$ mol [H<sub>2</sub>O<sub>2</sub>]

Conclusion: Relatively “low” conversion

**Table S1.** additional, numeric data for table 2, rel. product yield with 3-nonenic acid and various UPOs – product in %, apparently identified according to MS-ionization.

|                   | C2-OH | C3-OH | 3,4-Epox | C4-OH | C5-OH | C6-OH | C7-OH | C8-OH | C9-OH | $\Sigma$ Keto |
|-------------------|-------|-------|----------|-------|-------|-------|-------|-------|-------|---------------|
| <i>Cgl</i> UPO    | 2.8   | 0.0   | 56.2     | 11.9  | 1.3   | 0.0   | 0.0   | 0.0   | 0.0   | 27.9          |
| <i>Mro</i> UPO    | 0.0   | 80.5  | 0.0      | 6.5   | 0.0   | 0.0   | 0.0   | 0.0   | 0.0   | 12.9          |
| <i>Mwe</i> UPO    | 0.0   | 68.9  | 0.0      | 5.7   | 0.0   | 0.0   | 0.0   | 0.0   | 0.0   | 25.5          |
| <i>Aae</i> UPO    | 3.0   | 71.0  | 0.0      | 4.2   | 0.0   | 0.0   | 5.2   | 1.9   | 0.0   | 14.7          |
| <i>Cra</i> UPO2   | 1.6   | 55.6  | 0.0      | 5.2   | 0.0   | 0.0   | 8.1   | 2.7   | 0.0   | 26.7          |
| <i>Ceu</i> UPOMQ5 | 2.6   | 76.0  | 0.0      | 3.7   | 0.0   | 0.0   | 5.7   | 0.0   | 0.0   | 11.9          |
| <i>Cab</i> UPOMQ2 | 3.2   | 72.4  | 0.0      | 3.7   | 0.0   | 0.0   | 5.2   | 0.0   | 0.0   | 15.4          |
| <i>Ceu</i> UPOMS3 | 0.0   | 60.6  | 0.0      | 6.3   | 0.0   | 0.0   | 7.7   | 2.3   | 0.0   | 23.2          |
| <i>Cab</i> UPOMS2 | 0.0   | 68.6  | 0.0      | 5.4   | 0.0   | 0.0   | 5.9   | 2.0   | 0.0   | 18.0          |
| <i>rCab</i> UPO1  | 0.0   | 69.4  | 0.0      | 10.4  | 0.0   | 0.0   | 0.8   | 0.5   | 0.0   | 18.9          |
| <i>rCab</i> UPO2  | 0.0   | 79.5  | 0.0      | 4.1   | 0.0   | 0.0   | 5.0   | 0.0   | 0.0   | 11.4          |

**Table S2.** additional, numeric data for table 3, rel. product yield with 3-octenoic acid and various UPOs – product in %, apparently identified according to MS-ionization.

|                | C2-OH | C3-OH | 3,4-Epox | C4-OH | C5-OH | C6-OH | C7-OH | C8-OH | $\Sigma$ Keto |
|----------------|-------|-------|----------|-------|-------|-------|-------|-------|---------------|
| <i>Cgl</i> UPO | 0.0   | 0.0   | 72.4     | 6.4   | 0.0   | 0.0   | 0.0   | 0.0   | 21.1          |
| <i>Mro</i> UPO | 0.0   | 89.0  | 0.0      | 5.4   | 0.0   | 0.0   | 0.0   | 0.0   | 5.6           |
| <i>Aae</i> UPO | 0.0   | 80.2  | 0.0      | 2.3   | 2.1   | 1.5   | 3.9   | 0.0   | 10.1          |

**Table S3.** additional, numeric data for table 4, rel. product yield with 3-heptenoic and various UPOs – product in %, apparently identified according to MS-ionization

|                | C2-OH | C3-OH | 3,4-Epox | C4-OH | C5-OH | C6-OH | C7-OH | $\Sigma$ Keto |
|----------------|-------|-------|----------|-------|-------|-------|-------|---------------|
| <i>Cgl</i> UPO | 0.0   | 0.0   | 92.1     | 7.9   | 0.0   | 0.0   | 0.0   | 0.0           |
| <i>Mro</i> UPO | 0.0   | 92.1  | 0.0      | 7.9   | 0.0   | 0.0   | 0.0   | 0.0           |
| <i>Aae</i> UPO | 0.0   | 41.8  | 0.0      | 5.5   | 52.7  | 0.0   | 0.0   | 0.0           |

**Table S4.** additional, numeric data for table 5, rel. product yield with *trans*-2-nonenic and various UPOs – product in %, apparently identified according to MS-ionization. . \* refers to a product that has been hydroxylated at an unknown position.

|                | C2-OH | 2,3-Epox | C3-OH | C*   | C4-OH | C5-OH | C6-OH | C7-OH | C8-OH | C9-OH | $\Sigma$ Keto | di-OH |
|----------------|-------|----------|-------|------|-------|-------|-------|-------|-------|-------|---------------|-------|
| <i>Cgl</i> UPO | 1.2   | 26.2     | 0.0   | 10.9 | 44.9  | 1.0   | 0.0   | 1.2   | 0.0   | 0.0   | 14.6          | 0.0   |

|                   |      |      |      |     |     |     |      |      |      |     |     |      |
|-------------------|------|------|------|-----|-----|-----|------|------|------|-----|-----|------|
| <i>Mro</i> UPO    | 30.3 | 8.0  | 16.6 | 0.0 | 4.3 | 0.0 | 0.0  | 0.0  | 0.0  | 0.0 | 0.0 | 40.9 |
| <i>Mwe</i> UPO    | 39.6 | 5.5  | 31.1 | 0.0 | 4.8 | 0.0 | 0.0  | 4.2  | 0.0  | 0.0 | 0.0 | 14.8 |
| <i>Aae</i> UPO    | 26.9 | 18.5 | 5.9  | 0.0 | 0.0 | 0.0 | 0.0  | 25.2 | 23.6 | 0.0 | 0.0 | 0.0  |
| <i>Cra</i> UPO2   | 18.2 | 6.7  | 5.1  | 0.0 | 0.0 | 0.0 | 13.6 | 21.9 | 34.6 | 0.0 | 0.0 | 0.0  |
| <i>Ceu</i> UPOMQ5 | 9.8  | 84.7 | 2.6  | 0.0 | 0.0 | 0.0 | 0.0  | 2.1  | 0.8  | 0.0 | 0.0 | 0.0  |
| <i>Cab</i> UPOMQ2 | 12.4 | 80.3 | 2.8  | 0.0 | 0.0 | 0.0 | 0.0  | 3.3  | 1.3  | 0.0 | 0.0 | 0.0  |
| <i>Ceu</i> UPOMS3 | 21.0 | 57.4 | 2.4  | 0.0 | 2.4 | 0.0 | 0.0  | 8.0  | 8.8  | 0.0 | 0.0 | 0.0  |
| <i>Cab</i> UPOMS2 | 23.6 | 54.4 | 2.6  | 0.0 | 2.6 | 0.0 | 0.0  | 8.0  | 8.7  | 0.0 | 0.0 | 0.0  |
| <i>rCab</i> UPO1  | 33.9 | 4.9  | 18.5 | 0.0 | 2.1 | 0.0 | 0.0  | 4.1  | 36.6 | 0.0 | 0.0 | 0.0  |
| <i>rCab</i> UPO2  | 10.2 | 83.7 | 2.6  | 0.0 | 0.0 | 0.0 | 0.0  | 2.3  | 1.1  | 0.0 | 0.0 | 0.0  |

**Table S5.** additional, numeric data for table 6, rel. product yield with *trans*-2-octenoic acid and various UPOs – product in %, apparently identified according to MS-ionization. \* refers to a product that has been hydroxylated at an unknown position.

|                | C2-OH | 2,3-Epox | C3-OH | C*  | C4-OH | C5-OH | C6-OH | C7-OH | C8-OH | Σ Keto |
|----------------|-------|----------|-------|-----|-------|-------|-------|-------|-------|--------|
| <i>Cgl</i> UPO | 2.3   | 35.3     |       | 8.9 | 9.2   | 44.2  | 0.0   | 0.0   | 0.0   | 0.0    |
| <i>Mro</i> UPO | 12.3  | 4.3      |       | 0.0 | 0.0   | 11.9  | 0.0   | 0.0   | 0.0   | 71.6   |
| <i>Aae</i> UPO | 30.8  | 10.7     |       | 0.0 | 0.0   | 4.0   | 0.0   | 15.5  | 6.2   | 0.0    |

**Table S6.** additional, numeric data for table 7, rel. product yield with 2-heptenoic acid and various UPOs – product in %, apparently identified according to MS-ionization. \* refers to a product that has been hydroxylated at an unknown position.

|                | C2-OH | 2,3-Epox | C3-OH | C* | C4-OH | C5-OH | C6-OH | C7-OH | Σ Keto |
|----------------|-------|----------|-------|----|-------|-------|-------|-------|--------|
| <i>Cgl</i> UPO | 0.0   | 60.2     | 0.0   |    | 10.6  | 29.2  | 0.0   | 0.0   | 0.0    |
| <i>Mro</i> UPO | 4.9   | 0.0      | 77.8  |    | 0.0   | 17.3  | 0.0   | 0.0   | 0.0    |
| <i>Aae</i> UPO | 52.3  | 11.1     | 0.0   |    | 0.0   | 4.9   | 9.2   | 11.0  | 0.0    |
